# Supplementary material for: Luminescent LaF3:Yb3+/Er3+crystals with self-assembling microstructures by a facile ionothermal process
Source: Royal Society of Chemistry journal article supplement (doi:10.1039/c3ce41854e), 2013-11-25
Supplement: c3ce41854e.pdf [file c3ce41854e.pdf]

## Electronic Supplementary Information

### **Luminescent $\text{LaF}_3:\text{Yb}^{3+}/\text{Er}^{3+}$ Crystals with Self-assembling Microstructures by a Facile Ionothermal Process**

**Yuan Wu,<sup>†, ‡</sup> Dongmei Yang,<sup>†, ‡</sup> Xiaojiao Kang,<sup>†, ‡</sup> Yang Zhang,<sup>†, ‡</sup> Shanshan Huang,<sup>†</sup> Chunxia Li,<sup>\*, †</sup> and Jun Lin<sup>\*, †</sup>**

<sup>†</sup>State Key Laboratory of Rare Earth Resource Utilization, Changchun Institute of Applied Chemistry, Chinese Academy of Sciences, Changchun 130022, P. R. China

<sup>‡</sup>University of the Chinese Academy of Sciences, Beijing 100049, P. R. China

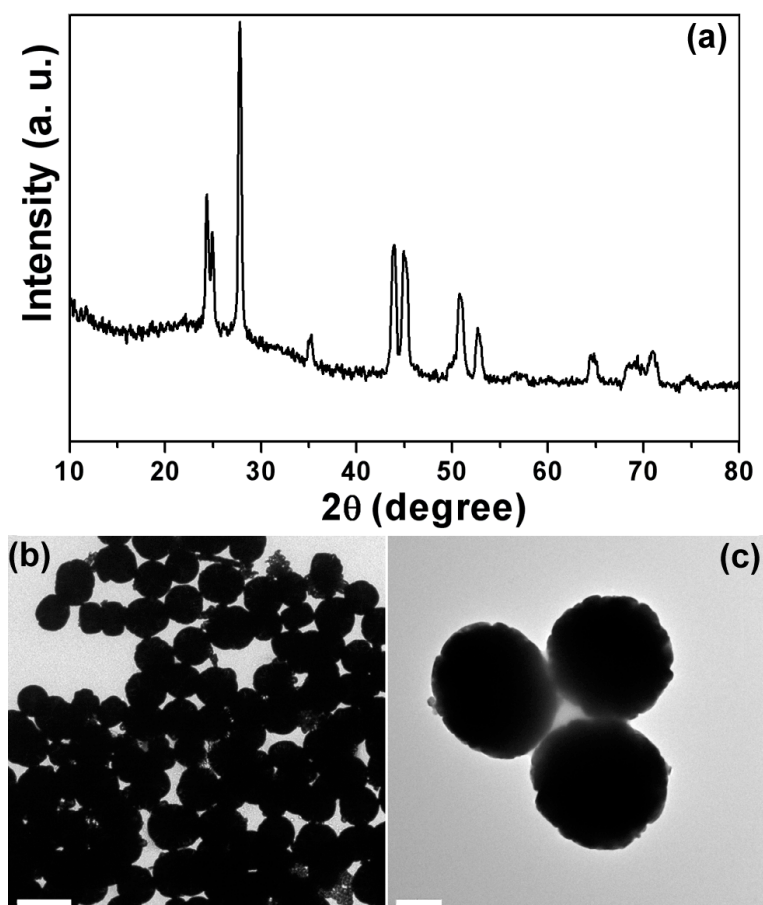

**Fig. S1** XRD pattern (a) and TEM images (b, c) of the products synthesized at 240 °C for 8 h with the filling percentage of 80% in Teflon-lined autoclave.

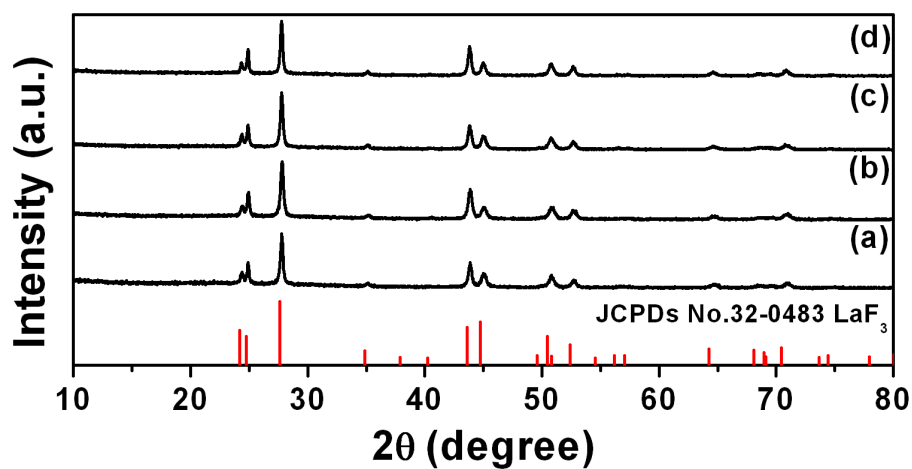

**Fig. S2** XRD patterns of the products synthesized at 240 °C for different reaction time: (a) 2 h, (b) 8 h, (c) 19 h, and (d) 24 h.

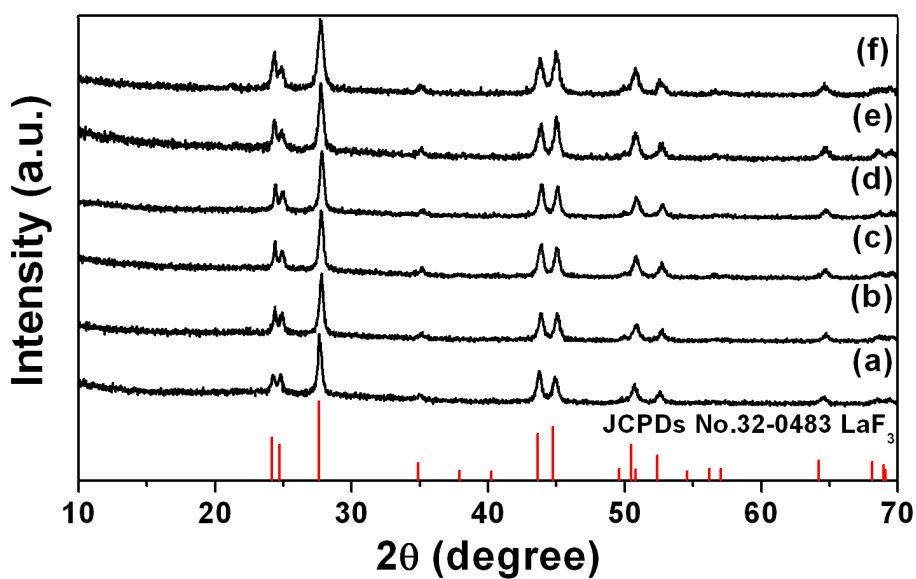

**Fig. S3** XRD patterns of the products synthesized under different volume ratio of IL/water at 240 °C for 8 h: (a) 1:4, (b) 1.5:3.5, (c) 2:3, (d) 3:2, (e) 4:1, and (f) 5:0.

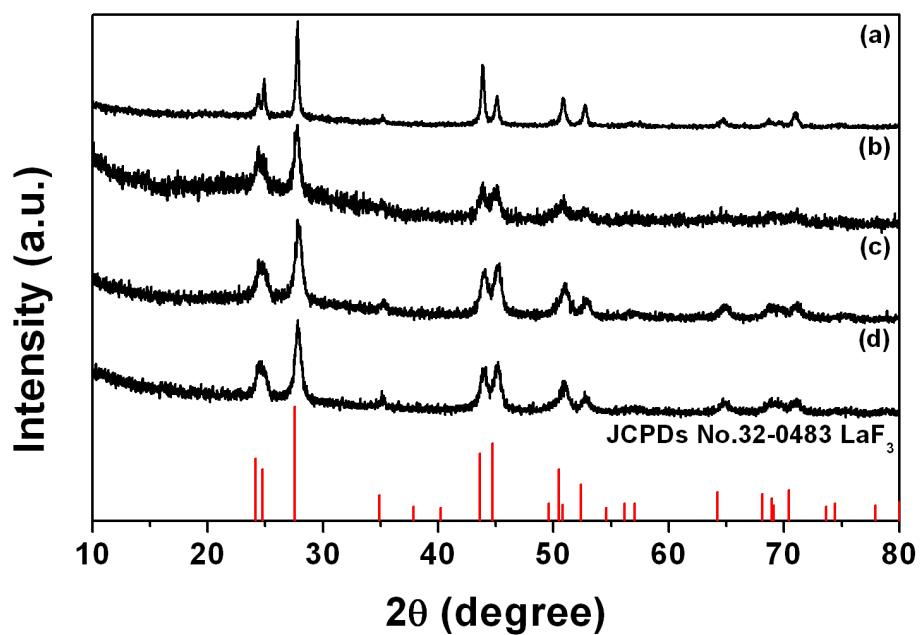

**Fig. S4** XRD patterns of the products synthesized under different solvent composition at 120 °C for 15 h: (a) water and IL, (b) ethanol and IL, (c) EG and IL, (d) DEG and IL.
